# Supplementary material for: Electric field manipulated magnetic spin coupling properties in lithium-trapped nitrogen-vacancy nanodiamonds
Source: Royal Society of Chemistry journal article supplement (doi:10.1039/d5cp00068h), 2025-01-01
Supplement: d5cp00068h12.pdf [file d5cp00068h12.pdf]

## Electric Field Manipulated Magnetic Spin Coupling Properties in Lithium-Trapped Nitrogen-Vacancy Nanodiamond

Zhuxiao Li, Zhiru Zhang, Yuxiang Bu, Xinyu Song\*

*School of Chemistry and Chemical Engineering, Shandong University, Jinan 250100,  
People's Republic of China. E-mail: songxy@sdu.edu.cn*

### Supplementary Material

#### Section S1. Details of Evaluating Components of the Effects of External Electric Field

The superscript of  $\mathbf{R}$  denotes whether the geometric structure is optimized under an external electric field (EF), and the superscript of  $\psi$  denotes whether the electron distribution is calculated under an EF. Therefore, the structure of clusters is optimized and calculated without an EF in the C...Li direction, its electron distribution and structure are denoted as  $\psi^0(\mathbf{R}^0)$ . The structure of clusters is optimized and calculated with an EF in the C...Li direction, denoted as NVLi-C, and its electron distribution and structure are denoted as  $\psi^F(\mathbf{R}^F)$ . The structure of clusters is optimized and calculated with an EF in the N...Li direction, denoted as NVLi-N. The structure of clusters is optimized with an EF in the C...Li direction, but the electron distribution is calculated at a single point without an EF, denoted as NVLi-C-SP, and its electron distribution and structure are denoted as  $\psi^0(\mathbf{R}^F)$ . They have the following relationship:

$$\psi^0(\mathbf{R}^0) \text{ -- structure deformation --} \rightarrow \psi^0(\mathbf{R}^F) \text{ -- electron relaxation --} \rightarrow \psi^F(\mathbf{R}^F)$$

The total effect of EF on clusters can be obtained by analyzing  $\psi^0(\mathbf{R}^0)$  and  $\psi^F(\mathbf{R}^F)$ . The indirect effect of EF on electrons by acting on geometric structure can be obtained by analyzing  $\psi^0(\mathbf{R}^0)$  and  $\psi^0(\mathbf{R}^F)$ . The direct effect of EF on electrons under the same structure can be obtained by analyzing the difference between  $\psi^0(\mathbf{R}^F)$  and  $\psi^F(\mathbf{R}^F)$ .

In addition, the structure of clusters is optimized without an EF in the C...Li direction, but the electron distribution is calculated at a single point with an EF, its electron distribution and structure are denoted as  $\psi^F(\mathbf{R}^0)$ , which can be used to analyze the atomic force.

$$\psi^0(\mathbf{R}^0) \text{ -- relaxation --} \rightarrow \psi^F(\mathbf{R}^0)$$

## Section S2. Structural Deformation and Electron Relaxation

The change of dipole moment in EF is a simple and direct index to measure the degree of polarization of the cluster. From the dipole moment of the NVLi-C-SP ( $\psi^0(\mathbf{R}^F)$ , Section S1) and the NVLi-C ( $\psi^F(\mathbf{R}^F)$ , Section S1), it can be clearly seen that the induced dipole moment formed by the polarization electrons changes significantly (Figure S1a).

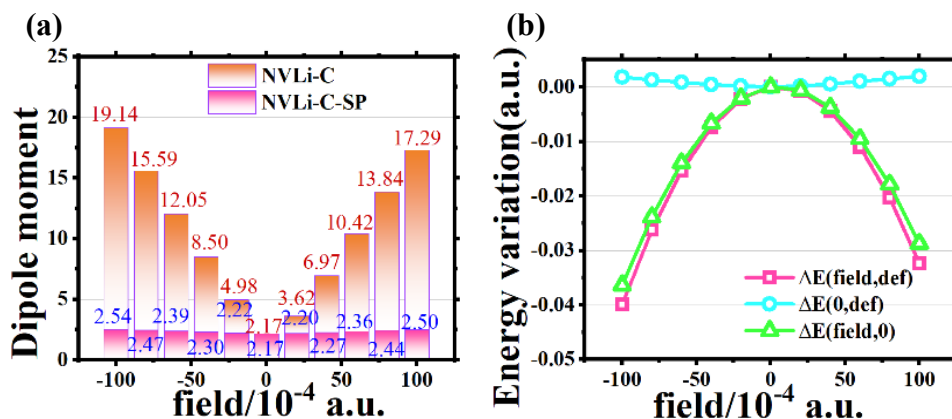

**Figure S1** (a) The change of the overall dipole moment of NVLi-C and NVLi-C-SP; (b) The ground state energy change after deformation or polarization is caused by different EF (along the C1...Li direction), including  $\Delta E[\psi^F(\mathbf{R}^F)]$ ,  $\Delta E[\psi^0(\mathbf{R}^F)]$ ,  $\Delta E[\psi^F(\mathbf{R}^0)]$ .

It can be seen from the energy change diagram (Figure S1b) that the energy increase caused by the structural deformation is much lower than the energy decrease caused by the electron relaxation in EF. However, the change of  $J$  value is also significant when only the structural deformation is considered (NVLi-C-SP, Table S1, Table S2), which shows that both structural deformation and electron relaxation are the important factors affecting  $J$  value, neither can be ignored.

### Section S3. Origin of Structural Deformation

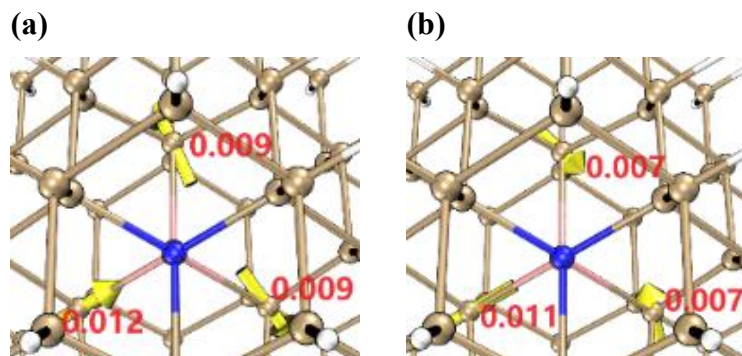

**Figure S2** (a) When EF is -0.01 a.u. (along the C1...Li direction), the force of C radical; (b) When EF is 0.01 a.u. (along the C1...Li direction), the force of C radical;

The direct cause of structural deformation is resulted from the force on the atoms. The force direction of the atoms can be observed by applying an electric field to the fixed structure, and then the factors such as the change of the atomic distances can be analyzed. The atomic force diagram shows that when  $EF < 0$ , the force direction of C1 points to the Li atom, while the force of C2 and C3 has the main component opposite to each other (Figure S2a). On the contrary, when  $EF > 0$ , the force of C1 deviates from the Li atom, while the force of C2 and C3 has the main component face to each other (Figure S2b).

The change of the force is due to the change of the components of the Coulomb force on the atom, which comes from the significantly change of electron cloud distribution under the EF (Figure 6a-b, Figure S1). When no EF is applied, the electron cloud is uniformly delocalized on three C radicals. When  $EF < 0$ , the electron cloud is mainly distributed between C1 and Li (Figure 6a). It can be considered that the repulsion of the C1 nucleus by  $\text{Li}^+$  cation is shielded by the delocalized electron cloud, so the C1 is subjected to the force pointing to Li. The electron cloud density between C2 and C3 is reduced, which weakens the shielding effect and enhances the repulsion between C2 and C3. Therefore, the distance between C2...C3 when  $EF < 0$  is larger than that without the EF, while the distance between C1...C2 and C1...C3 is smaller than that without the EF. When  $EF > 0$ , the situation is opposite (Figure 6b). In addition, the  $\text{Li}^+$  cation is directly affected by EF because of its positive net charge.

## Section S4. Qualitative Analysis of SOMO Overlap and Approximate Orbital Interaction

Some studies have pointed out that when the SOMOs overlap, the system exhibits ferromagnetism (FM), and when SOMOs doesn't overlap, the system exhibits antiferromagnetism (AFM). However, it is noted that the qualitative analysis cannot well indicate the change of SOMOs overlapping under the change of EF. In addition, it is obvious that the Coulomb integral and exchange integral between orbits is positively correlated with the degree of overlap between orbits, and we know that the Coulomb integral and exchange integral between orbits can quantitatively describe the factors of orbital interaction in magnetic coupling. Therefore, the SOMOs overlapping is quantified and its relationship with the Coulomb integral and exchange integral between SOMOs is analyzed.

The overlap integral of square of the two orbitals (the electron density on the orbits) can accurately and quantitatively measure the degree of overlap between the orbits. The expression is as follows:

$$\int |\varphi_i(\mathbf{r})|^2 |\varphi_j(\mathbf{r})|^2 d\mathbf{r}$$

This formula shows that the product of the composition ratios of the two orbitals on the same atom can be approximately considered as the overlap on the atom, so the sum of the product of the composition ratios of the two orbitals of all the atoms can approximately measure the degree of overlap between the two orbitals. Considering that SOMOs are mainly distributed on three C radicals, only the sum of the product of the two SOMOs components on the C radicals is calculated. The above-mentioned related quantities are linearly fitted, and they all show a good linear positive correlation (Figure S9). Therefore, the sum of the product of the proportion of C radicals in the two SOMOs components can be used to approximately represent the Coulomb integral and the exchange integral.

## Section S5. Other Computational Results

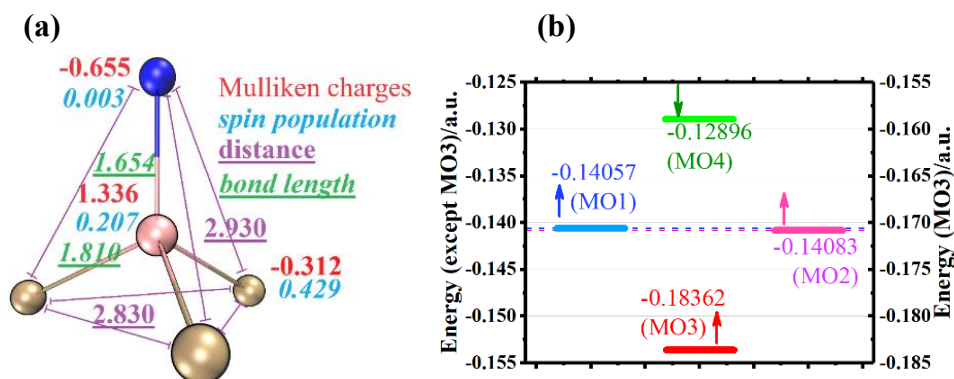

**Figure S3** (a) Structure, Mulliken charges (red) and spin populations (blue) at N, Li and C, and interatomic distances of adjacent atoms of the NVLi center; (b) The orbital energy of four outer occupied orbitals of NVLi-C in the T ground state without EF.

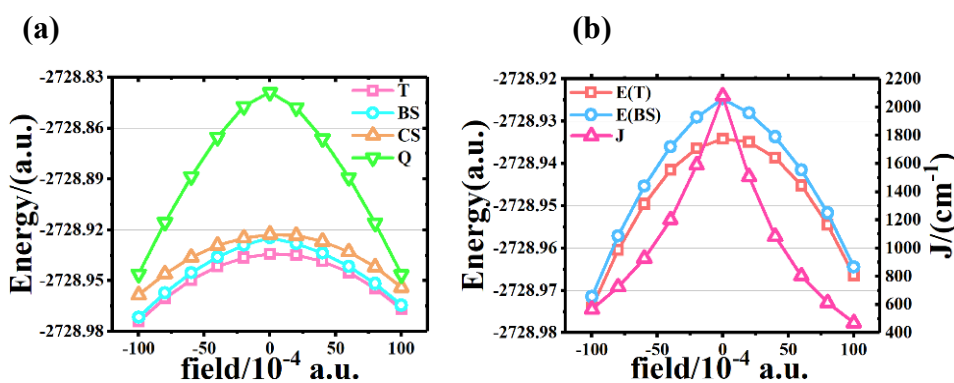

**Figure S4** (a) The energies of the NVLi cluster in the T, BS, CS and Q state vary with EF (along the C1...Li direction); (b) The triplet (T), symmetry-breaking singlet (BS) energy and magnetic coupling constant ( $J$ ) change with EF (along the C...Li direction).

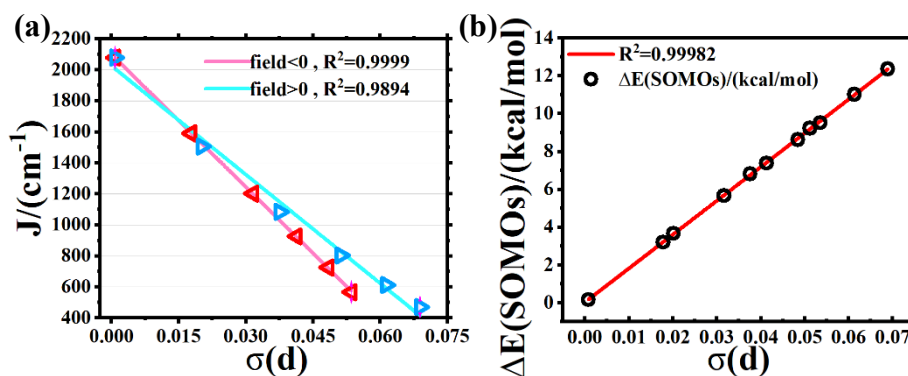

**Figure S5** (a) Linear correlation of the magnetic coupling constant ( $J$ ) with the standard deviation of the distances of C radicals ( $\sigma(d)$ ), which is defined as:  $\sigma(d) = \sqrt{\frac{\sum_{i \neq j}^n (d_{ij} - \bar{d})^2}{n}}$ ; (b) The linear correlation between  $\Delta E_{\text{SOMOs}}$  and the standard deviation of the distances of C radicals ( $\sigma(d)$ ) of NVLi-C-SP.

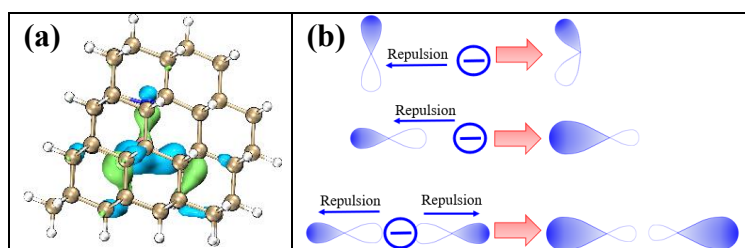

**Figure S6** (a) MO3 orbital distribution isosurface side view; (b) The diagram of polarization deformation of the orbit due to the repulsion from EF or electric cloud.

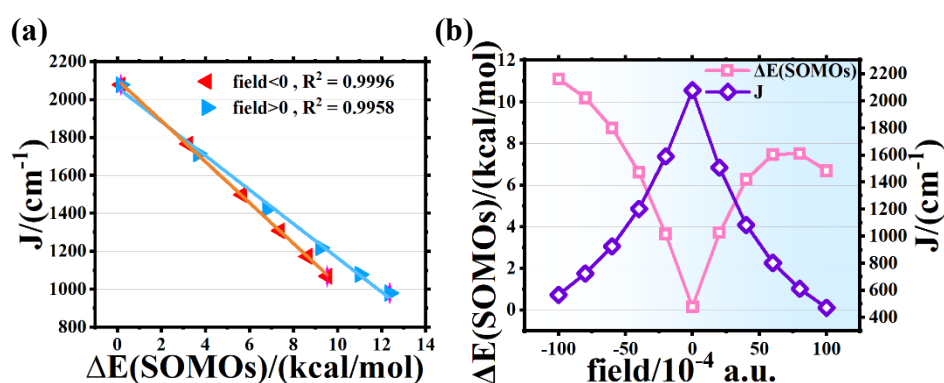

**Figure S7** (a)  $\Delta E_{\text{SOMOs}}$  and  $J$  value linear fitting of NVLi-C-SP; (b) The change of  $\Delta E_{\text{SOMOs}}$  and  $J$  value with EF (along the C1...Li direction) of NVLi-C.

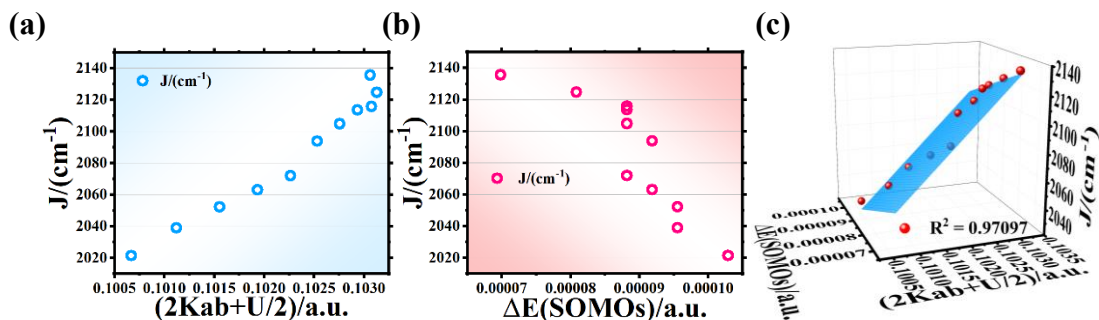

**Figure S8** (a) The association between  $J$  and SOMOs interaction  $(2K_{ab} + \frac{U}{2})$  of NVLi-N; (b) The correlation between  $J$  and  $\Delta E_{SS}$  of NVLi-N; (c) The plane fitting of  $J$  with the two terms of eq 5 of NVLi-N, rotated along the Z-axis to make the fitted plane more pronounced.

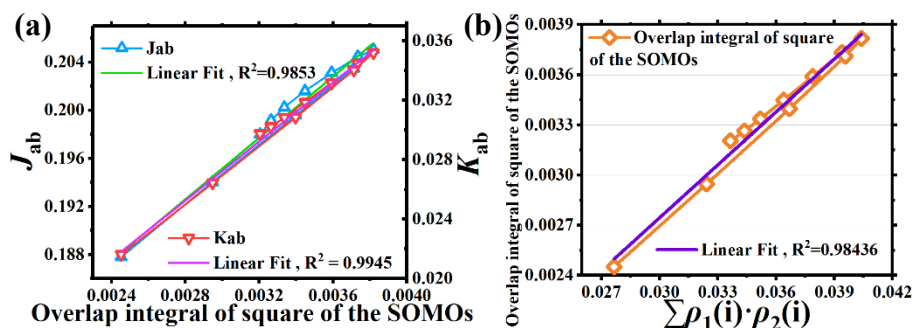

**Figure S9** (a) The linear fit between the Coulomb integral ( $J_{ab}$ ) and the overlap integral of square, the exchange integral ( $K_{ab}$ ) and the overlap integral of square between SOMOs; (b) A linear fit between the overlap integral of square between SOMOs and the sum of the product of the contributions of the same atom of the two SOMO components.

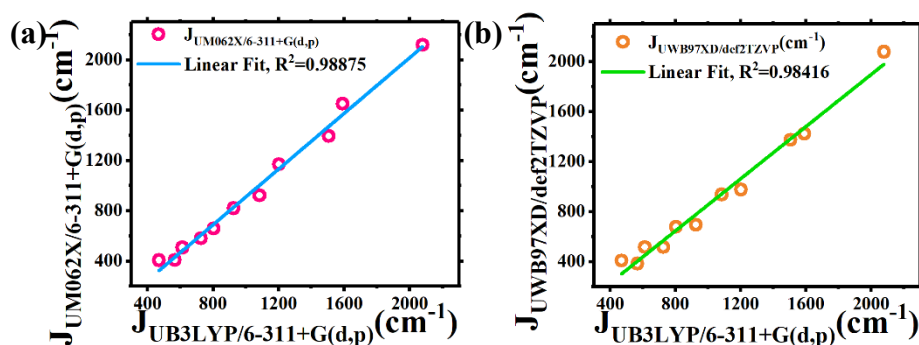

**Figure S10** (a) The linear correlation between the magnetic coupling constant ( $J$ , at the (U)M062X/6-311+G (d, p) level) and  $J$  (at the (U)B3LYP/6-311+G (d, p) level) for NVLi-C; (b) The linear correlation between  $J$  (at the (U)ωB97XD/def2TZVP level) and  $J$  (at the (U)B3LYP/6-311+G (d, p) level) for NVLi-C.

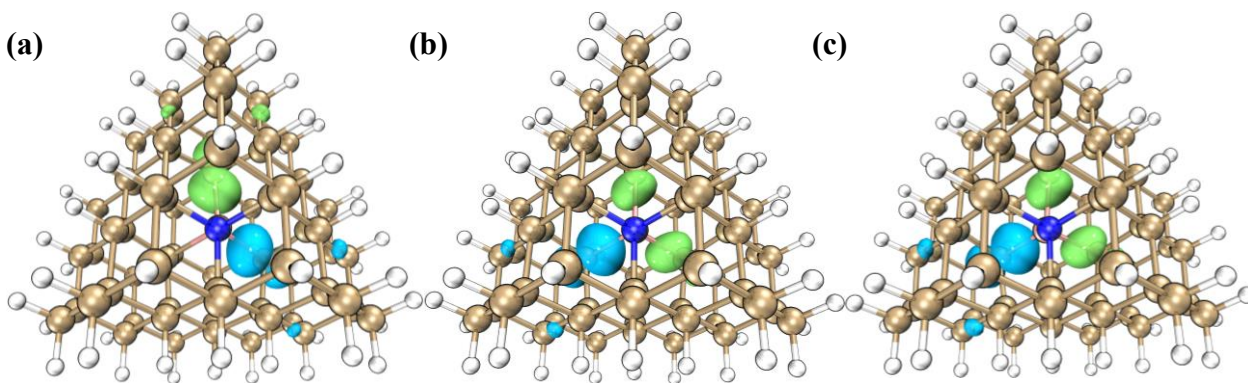

**Figure S11** Isosurfaces of spin density distributions of BS state of NVLi-C at EF of -0.01a.u. (a), 0 a.u. (b) and 0.01a.u. (c), respectively.

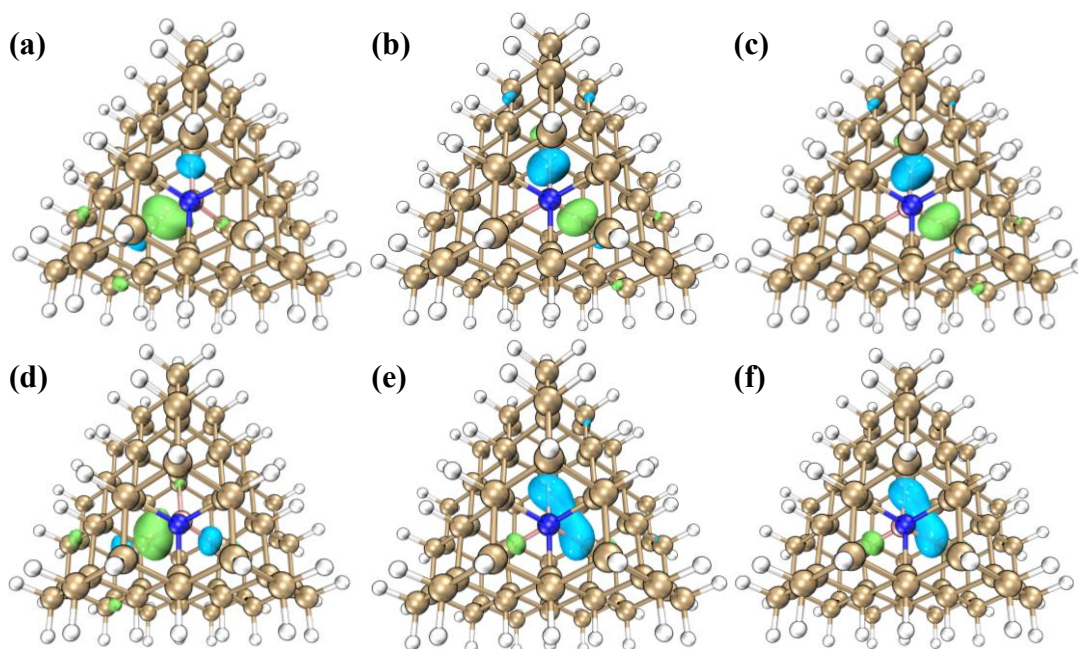

**Figure S12 (a-c)** The isosurface diagrams of SOMO $\alpha$  distributions of BS state of NVLi-C at EF of -0.01 a.u., 0 a.u. and 0.01 a.u., respectively; **(d-f)** The isosurface diagrams of SOMO $\beta$  distributions of BS state of NVLi-C at EF of -0.01a.u., 0 a.u. and 0.01a.u., respectively.



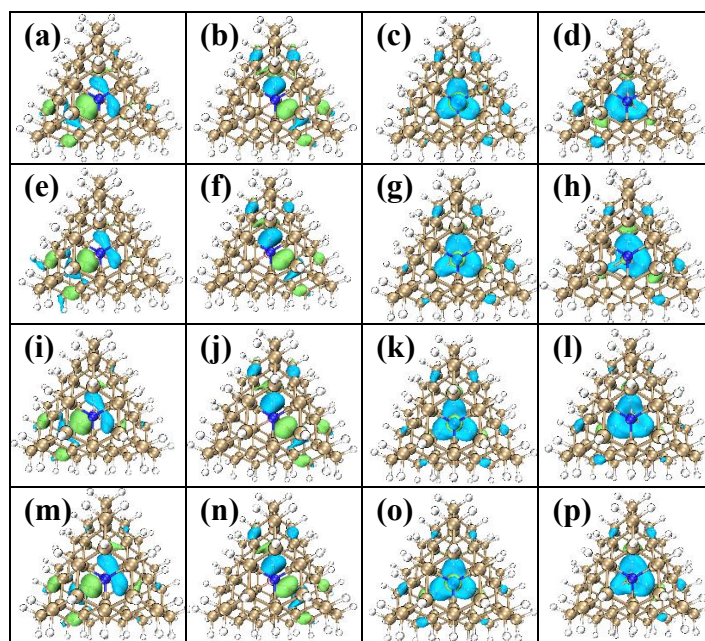

**Figure S13** EF effect on FMO distributions. **(a-d)** The isosurface diagrams of FMO distributions of NVLi-C under EF = -0.01 a.u.; **(e-h)** Those of NVLi-C under EF = 0.01 a.u.; **(i-l)** Those of NVLi-C-SP without EF but at the geometry deformed by EF (-0.01 a.u.); **(m-p)** Those of NVLi-C-SP without EF but at the geometry deformed by EF (0.01 a.u.)

**Table S1.** The energy ( $E$ ), the squared eigenvalue of spin angular momentum ( $\langle S^2 \rangle$ ) and the magnetic coupling constant ( $J$ ) of NVLi-C.

| field/ $10^{-4}$ a.u. | $E_T$ /a.u. ( $\langle S^2 \rangle_T$ ) | $E_{BS}$ /a.u. ( $\langle S^2 \rangle_{BS}$ ) | $J(\text{cm}^{-1})$ |
|-----------------------|-----------------------------------------|-----------------------------------------------|---------------------|
| -100                  | -2728.97405(2.010)                      | -2728.97146(1.007)                            | 566.74              |
| -80                   | -2728.96040(2.010)                      | -2728.95708(1.005)                            | 725.03              |
| -60                   | -2728.94955(2.010)                      | -2728.94530(1.003)                            | 926.28              |
| -40                   | -2728.94153(2.010)                      | -2728.93601(1.002)                            | 1201.88             |
| -20                   | -2728.93638(2.010)                      | -2728.92907(1.001)                            | 1590.05             |
| 0                     | -2728.93416(2.010)                      | -2728.92468(1.009)                            | 2078.54             |
| 20                    | -2728.93492(2.010)                      | -2728.92805(1.009)                            | 1506.28             |
| 40                    | -2728.93861(2.010)                      | -2728.93367(1.009)                            | 1083.12             |
| 60                    | -2728.94516(2.010)                      | -2728.94150(1.010)                            | 803.28              |
| 80                    | -2728.95447(2.010)                      | -2728.95168(1.010)                            | 612.33              |
| 100                   | -2728.96653(2.010)                      | -2728.96442(1.025)                            | 470.14              |

**Table S2.** The energy ( $E$ ), the squared eigenvalue of spin angular momentum ( $\langle S^2 \rangle$ ) and the magnetic coupling constant ( $J$ ) of NVLi-C-SP.

| field/ $10^{-4}$ a.u. | $E_T$ /a.u. ( $\langle S^2 \rangle_T$ ) | $E_{BS}$ /a.u. ( $\langle S^2 \rangle_{BS}$ ) | $J(\text{cm}^{-1})$ |
|-----------------------|-----------------------------------------|-----------------------------------------------|---------------------|
| -100                  | -2728.93238(2.010)                      | -2728.92738(0.983)                            | 1068.52             |
| -80                   | -2728.93285(2.010)                      | -2728.92737(0.985)                            | 1173.39             |
| -60                   | -2728.93329(2.010)                      | -2728.92719(0.987)                            | 1308.70             |
| -40                   | -2728.93370(2.010)                      | -2728.92674(0.991)                            | 1499.06             |
| -20                   | -2728.93402(2.010)                      | -2728.92586(0.996)                            | 1766.19             |
| 0                     | -2728.93416(2.010)                      | -2728.92468(1.009)                            | 2078.54             |
| 20                    | -2728.93401(2.010)                      | -2728.92619(1.009)                            | 1714.58             |
| 40                    | -2728.93363(2.010)                      | -2728.92713(1.009)                            | 1425.16             |
| 60                    | -2728.93315(2.010)                      | -2728.92759(1.009)                            | 1219.06             |
| 80                    | -2728.93266(2.010)                      | -2728.92774(1.009)                            | 1078.74             |
| 100                   | -2728.93218(2.010)                      | -2728.92771(1.009)                            | 980.07              |

**Table S3.** The spin populations at N, C radicals and Li under different EFs of NVLi-C, based on Becke 's population analysis.

| field/ $10^{-4}$ a.u. | N       | C1      | C2      | C3      | Li      |
|-----------------------|---------|---------|---------|---------|---------|
| -100                  | 0.00272 | 0.22400 | 0.52552 | 0.52498 | 0.20575 |
| -80                   | 0.00281 | 0.25614 | 0.51162 | 0.51086 | 0.20561 |
| -60                   | 0.00289 | 0.29153 | 0.49557 | 0.49450 | 0.20590 |
| -40                   | 0.00293 | 0.33193 | 0.47670 | 0.47527 | 0.20622 |
| -20                   | 0.00294 | 0.37832 | 0.45432 | 0.45255 | 0.20662 |
| 0                     | 0.00293 | 0.42871 | 0.42899 | 0.42710 | 0.20712 |
| 20                    | 0.00293 | 0.47639 | 0.40393 | 0.40224 | 0.20759 |
| 40                    | 0.00293 | 0.51278 | 0.38384 | 0.38260 | 0.20793 |
| 60                    | 0.00289 | 0.53700 | 0.36971 | 0.36874 | 0.20828 |
| 80                    | 0.00284 | 0.55217 | 0.36011 | 0.35926 | 0.20859 |
| 100                   | 0.00283 | 0.56169 | 0.35409 | 0.35327 | 0.20864 |

**Table S4.** The internuclear distance of C $\cdots$ Li and N $\cdots$ Li under different intensities of NVLi-N.

| field/ $10^{-4}$ a.u. | $d_{(N\cdots Li)}/\text{\AA}$ | $d_{(C1\cdots Li)}/\text{\AA}$ | $d_{(C2\cdots Li)}/\text{\AA}$ | $d_{(C3\cdots Li)}/\text{\AA}$ |
|-----------------------|-------------------------------|--------------------------------|--------------------------------|--------------------------------|
| -100                  | 1.66247                       | 1.80804                        | 1.80831                        | 1.80775                        |
| -80                   | 1.65818                       | 1.80914                        | 1.80943                        | 1.80886                        |
| -60                   | 1.65712                       | 1.80936                        | 1.80965                        | 1.80908                        |
| -40                   | 1.65611                       | 1.80961                        | 1.80990                        | 1.80932                        |
| -20                   | 1.65515                       | 1.80988                        | 1.81017                        | 1.80959                        |
| 0                     | 1.65428                       | 1.81014                        | 1.81045                        | 1.80987                        |
| 20                    | 1.65339                       | 1.81049                        | 1.81079                        | 1.81019                        |
| 40                    | 1.65260                       | 1.81082                        | 1.81113                        | 1.81053                        |
| 60                    | 1.65187                       | 1.81119                        | 1.81149                        | 1.81089                        |
| 80                    | 1.64960                       | 1.81216                        | 1.81246                        | 1.81186                        |
| 100                   | 1.64725                       | 1.81327                        | 1.81356                        | 1.81296                        |

**Table S5.** The internuclear distance of N-C and C-C under different intensities of NVLi-N.

| field/ $10^{-4}$ a.u. | $d_{(N\cdots C1)}/\text{\AA}$ | $d_{(N\cdots C2)}/\text{\AA}$ | $d_{(N\cdots C3)}/\text{\AA}$ | $d_{(C1\cdots C2)}/\text{\AA}$ | $d_{(C1\cdots C3)}/\text{\AA}$ | $d_{(C2\cdots C3)}/\text{\AA}$ |
|-----------------------|-------------------------------|-------------------------------|-------------------------------|--------------------------------|--------------------------------|--------------------------------|
| -100                  | 2.93328                       | 2.93281                       | 2.93348                       | 2.83044                        | 2.83119                        | 2.83080                        |
| -80                   | 2.93233                       | 2.9319                        | 2.93254                       | 2.82977                        | 2.83046                        | 2.83013                        |
| -60                   | 2.93182                       | 2.93139                       | 2.93203                       | 2.82985                        | 2.83053                        | 2.83021                        |
| -40                   | 2.93138                       | 2.93096                       | 2.93159                       | 2.82996                        | 2.83063                        | 2.83032                        |
| -20                   | 2.93102                       | 2.93059                       | 2.93122                       | 2.83009                        | 2.83076                        | 2.83045                        |
| 0                     | 2.93072                       | 2.93030                       | 2.93093                       | 2.83025                        | 2.83092                        | 2.83062                        |
| 20                    | 2.93050                       | 2.93008                       | 2.93070                       | 2.83045                        | 2.83110                        | 2.83080                        |
| 40                    | 2.93035                       | 2.92993                       | 2.93055                       | 2.83066                        | 2.83131                        | 2.83101                        |
| 60                    | 2.93027                       | 2.92986                       | 2.93047                       | 2.83090                        | 2.83155                        | 2.83125                        |
| 80                    | 2.93008                       | 2.92967                       | 2.93027                       | 2.83119                        | 2.83180                        | 2.83150                        |
| 100                   | 2.93083                       | 2.93044                       | 2.93102                       | 2.83037                        | 2.83090                        | 2.83063                        |

**Table S6.** The contribution of atoms to the composition of MO1 of NVLi-N.

| field/ $10^{-4}$ a.u. | C1     | C2     | C3    | N     | Li    |
|-----------------------|--------|--------|-------|-------|-------|
| -100                  | 16.678 | 26.314 | 2.087 | 0.581 | 3.883 |
| -80                   | 17.390 | 26.077 | 1.864 | 0.581 | 3.872 |
| -60                   | 17.520 | 26.162 | 1.852 | 0.580 | 3.866 |
| -40                   | 17.654 | 26.228 | 1.835 | 0.580 | 3.859 |
| -20                   | 17.806 | 26.267 | 1.809 | 0.580 | 3.850 |
| 0                     | 17.995 | 26.265 | 1.768 | 0.580 | 3.840 |
| 20                    | 18.040 | 26.344 | 1.774 | 0.581 | 3.828 |
| 40                    | 18.115 | 26.387 | 1.765 | 0.582 | 3.815 |
| 60                    | 18.207 | 26.403 | 1.749 | 0.584 | 3.801 |
| 80                    | 18.218 | 26.463 | 1.756 | 0.586 | 3.781 |
| 100                   | 18.267 | 26.488 | 1.751 | 0.588 | 3.758 |

**Table S7.** The contribution of atoms to the composition of MO2 of NVLi-N.

| field/ $10^{-4}$ a.u. | C1     | C2    | C3     | N     | Li    |
|-----------------------|--------|-------|--------|-------|-------|
| -100                  | 13.364 | 3.749 | 27.938 | 0.580 | 3.881 |
| -80                   | 12.821 | 4.152 | 28.332 | 0.580 | 3.870 |
| -60                   | 12.826 | 4.202 | 28.480 | 0.580 | 3.864 |
| -40                   | 12.816 | 4.257 | 28.620 | 0.579 | 3.857 |
| -20                   | 12.774 | 4.328 | 28.757 | 0.579 | 3.848 |
| 0                     | 12.683 | 4.427 | 28.896 | 0.580 | 3.838 |
| 20                    | 12.724 | 4.434 | 28.978 | 0.580 | 3.827 |
| 40                    | 12.722 | 4.464 | 29.061 | 0.581 | 3.814 |
| 60                    | 12.691 | 4.508 | 29.138 | 0.583 | 3.800 |
| 80                    | 12.733 | 4.500 | 29.185 | 0.586 | 3.781 |
| 100                   | 12.730 | 4.521 | 29.239 | 0.588 | 3.757 |

**Table S8.** The contribution of atoms to the composition of MO3 of NVLi-N.

| field/ $10^{-4}$ a.u. | C1     | C2     | C3     | N      | Li    |
|-----------------------|--------|--------|--------|--------|-------|
| -100                  | 13.430 | 13.421 | 13.433 | 1.648  | 4.316 |
| -80                   | 13.353 | 13.345 | 13.355 | 1.863  | 4.302 |
| -60                   | 13.213 | 13.205 | 13.215 | 2.212  | 4.274 |
| -40                   | 13.004 | 12.996 | 13.007 | 2.695  | 4.232 |
| -20                   | 12.695 | 12.686 | 12.697 | 3.383  | 4.170 |
| 0                     | 12.232 | 12.222 | 12.235 | 4.393  | 4.080 |
| 20                    | 11.538 | 11.527 | 11.541 | 5.902  | 3.948 |
| 40                    | 10.506 | 10.493 | 10.508 | 8.161  | 3.762 |
| 60                    | 9.045  | 9.031  | 9.048  | 11.391 | 3.513 |
| 80                    | 7.263  | 7.248  | 7.266  | 15.354 | 3.229 |
| 100                   | 5.346  | 5.331  | 5.349  | 19.640 | 2.946 |

**Table S9.** The contribution of atoms to the composition of MO4 of NVLi-N.

| field/ $10^{-4}$ a.u. | C1     | C2     | C3     | N     | Li    |
|-----------------------|--------|--------|--------|-------|-------|
| -100                  | 15.285 | 15.343 | 15.246 | 0.670 | 5.659 |
| -80                   | 15.309 | 15.358 | 15.269 | 0.676 | 5.666 |
| -60                   | 15.319 | 15.366 | 15.280 | 0.696 | 5.671 |
| -40                   | 15.324 | 15.368 | 15.286 | 0.720 | 5.674 |
| -20                   | 15.323 | 15.365 | 15.287 | 0.750 | 5.674 |
| 0                     | 15.317 | 15.354 | 15.279 | 0.786 | 5.673 |
| 20                    | 15.300 | 15.337 | 15.265 | 0.830 | 5.669 |
| 40                    | 15.274 | 15.309 | 15.241 | 0.886 | 5.663 |
| 60                    | 15.237 | 15.269 | 15.204 | 0.957 | 5.652 |
| 80                    | 15.187 | 15.216 | 15.158 | 1.038 | 5.638 |
| 100                   | 15.120 | 15.145 | 15.095 | 1.138 | 5.618 |

**Table S10.** The atomic spin population of NVLi-N.

| field/ $10^{-4}$ a.u. | N      | C1    | C2    | C3    | Li    |
|-----------------------|--------|-------|-------|-------|-------|
| -100                  | -0.006 | 0.542 | 0.541 | 0.543 | 0.161 |
| -80                   | -0.006 | 0.545 | 0.544 | 0.545 | 0.157 |
| -60                   | -0.005 | 0.546 | 0.545 | 0.547 | 0.154 |
| -40                   | -0.005 | 0.548 | 0.547 | 0.549 | 0.151 |
| -20                   | -0.005 | 0.550 | 0.549 | 0.550 | 0.147 |
| 0                     | -0.005 | 0.551 | 0.551 | 0.552 | 0.144 |
| 20                    | -0.005 | 0.553 | 0.552 | 0.553 | 0.141 |
| 40                    | -0.005 | 0.555 | 0.554 | 0.555 | 0.138 |
| 60                    | -0.005 | 0.556 | 0.555 | 0.556 | 0.135 |
| 80                    | -0.004 | 0.558 | 0.557 | 0.558 | 0.131 |
| 100                   | -0.004 | 0.559 | 0.559 | 0.559 | 0.127 |

**Table S11.** The  $\Delta E_{SOMOs}$  of clusters under different conditions.

| field/ $10^{-4}$ a.u. | $\Delta E_{SOMOs}$<br>of NVLi-N<br>/(kcal/mol) | $\Delta E_{SOMOs}$<br>of NVLi-C-SP<br>/(kcal/mol) | $\Delta E_{SOMOs}$<br>of NVLi-C<br>/(kcal/mol) |
|-----------------------|------------------------------------------------|---------------------------------------------------|------------------------------------------------|
| -100                  | 0.065                                          | 9.53                                              | 11.11                                          |
| -80                   | 0.060                                          | 8.63                                              | 10.19                                          |
| -60                   | 0.060                                          | 7.39                                              | 8.75                                           |
| -40                   | 0.058                                          | 5.67                                              | 6.62                                           |
| -20                   | 0.055                                          | 3.21                                              | 3.65                                           |
| 0                     | 0.058                                          | 0.16                                              | 0.16                                           |
| 20                    | 0.055                                          | 3.67                                              | 3.72                                           |
| 40                    | 0.055                                          | 6.82                                              | 6.27                                           |
| 60                    | 0.055                                          | 9.23                                              | 7.47                                           |
| 80                    | 0.051                                          | 11.02                                             | 7.52                                           |
| 100                   | 0.044                                          | 12.37                                             | 6.69                                           |

**Table S12.** The energy ( $E$ ), the squared eigenvalue of spin angular momentum ( $\langle S^2 \rangle$ ) and the magnetic coupling constant ( $J$ ) of NVLi-N.

| field/ $10^{-4}$ a.u. | $E_T$ /a.u. ( $\langle S^2 \rangle_T$ ) | $E_{BS}$ /a.u. ( $\langle S^2 \rangle_{BS}$ ) | $J(\text{cm}^{-1})$ |
|-----------------------|-----------------------------------------|-----------------------------------------------|---------------------|
| -100                  | -2728.94876(2.010)                      | -2728.93954(1.009)                            | 2021.53             |
| -80                   | -2728.93947(2.010)                      | -2728.93017(1.009)                            | 2039.07             |
| -60                   | -2728.93265(2.010)                      | -2728.92329(1.009)                            | 2052.23             |
| -40                   | -2728.92827(2.010)                      | -2728.91886(1.009)                            | 2063.19             |
| -20                   | -2728.92631(2.010)                      | -2728.91686(1.009)                            | 2071.96             |
| 0                     | -2728.92679(2.010)                      | -2728.91724(1.009)                            | 2093.89             |
| 20                    | -2728.92970(2.010)                      | -2728.92010(1.009)                            | 2104.85             |
| 40                    | -2728.93505(2.010)                      | -2728.92541(1.009)                            | 2113.62             |
| 60                    | -2728.94283(2.010)                      | -2728.93318(1.009)                            | 2115.81             |
| 80                    | -2728.95308(2.011)                      | -2728.94338(1.009)                            | 2124.65             |
| 100                   | -2728.96578(2.011)                      | -2728.95603(1.009)                            | 2135.61             |

**Table S13.** The  $\Delta E_{SOMOs}$  and the standard deviation of the distances of C radicals

$$(\sigma(d) = \sqrt{\frac{\sum_{i \neq j}^n (d_{ij} - \bar{d})^2}{n}})$$
 of NVLi-C-SP.

| field/ $10^{-4}$ a.u. | $\sigma(d) / \text{\AA}$ | $\Delta E_{SOMOs} / (\text{kcal/mol})$ |
|-----------------------|--------------------------|----------------------------------------|
| -100                  | 0.05352                  | 9.53                                   |
| -80                   | 0.04845                  | 8.63                                   |
| -60                   | 0.04131                  | 7.39                                   |
| -40                   | 0.03162                  | 5.67                                   |
| -20                   | 0.01778                  | 3.21                                   |
| 0                     | 0.00080                  | 0.16                                   |
| 20                    | 0.02014                  | 3.67                                   |
| 40                    | 0.03755                  | 6.82                                   |
| 60                    | 0.05115                  | 9.23                                   |
| 80                    | 0.06126                  | 11.02                                  |
| 100                   | 0.06887                  | 12.37                                  |

**Table S14.** The SOMOs interaction ( $2K_{ab} + \frac{U}{2}$ ).

| field/ $10^{-4}$ a.u. | NVLi-N /a.u. | NVLi-C-SP /a.u. | NVLi-C /a.u. |
|-----------------------|--------------|-----------------|--------------|
| -100                  | 0.10067      | 0.10643         | 0.10722      |
| -80                   | 0.10112      | 0.10648         | 0.10767      |
| -60                   | 0.10155      | 0.10672         | 0.10805      |
| -40                   | 0.10193      | 0.10714         | 0.10847      |
| -20                   | 0.10226      | 0.10777         | 0.1089       |
| 0                     | 0.10253      | 0.10223         | 0.10223      |
| 20                    | 0.10276      | 0.10423         | 0.10359      |
| 40                    | 0.10294      | 0.10623         | 0.10191      |
| 60                    | 0.10308      | 0.10801         | 0.0969       |
| 80                    | 0.10313      | 0.10956         | 0.08956      |
| 100                   | 0.10306      | 0.11096         | 0.07857      |

**Table S15.** The energy ( $E$ ), the squared eigenvalue of spin angular momentum ( $\langle S^2 \rangle$ ) and the magnetic coupling constant ( $J$ ) of NVLi-C at the (U)M062X/6-311+G (d, p) level.

| field/ $10^{-4}$ a.u. | $E_T$ /a.u. ( $\langle S^2 \rangle_T$ ) | $E_{BS}$ /a.u. ( $\langle S^2 \rangle_{BS}$ ) | $J(\text{cm}^{-1})$ |
|-----------------------|-----------------------------------------|-----------------------------------------------|---------------------|
| -100                  | -2727.59413(2.010)                      | -2727.59227(1.010)                            | 408.22              |
| -80                   | -2727.58025(2.010)                      | -2727.57760(1.010)                            | 581.61              |
| -60                   | -2727.56918(2.011)                      | -2727.56544(1.009)                            | 819.20              |
| -40                   | -2727.56099(2.011)                      | -2727.55565(1.009)                            | 1169.66             |
| -20                   | -2727.55575(2.012)                      | -2727.54821(1.010)                            | 1651.54             |
| 0                     | -2727.55350(2.012)                      | -2727.54384(1.011)                            | 2118.01             |
| 20                    | -2727.55433(2.011)                      | -2727.54798(1.011)                            | 1393.66             |
| 40                    | -2727.55826(2.011)                      | -2727.55406(1.011)                            | 921.79              |
| 60                    | -2727.56511(2.011)                      | -2727.56211(1.011)                            | 658.42              |
| 80                    | -2727.57462(2.011)                      | -2727.57231(1.012)                            | 507.49              |
| 100                   | -2727.58669(2.011)                      | -2727.58484(1.013)                            | 406.84              |



**Table S16.** The energy ( $E$ ), the squared eigenvalue of spin angular momentum ( $\langle S^2 \rangle$ ) and the magnetic coupling constant ( $J$ ) of NVLi-C at the (U) $\omega$ B97XD/def2TZVP level.

| field/ $10^{-4}$ a.u. | $E_T$ /a.u. ( $\langle S^2 \rangle_T$ ) | $E_{BS}$ /a.u. ( $\langle S^2 \rangle_{BS}$ ) | $J(\text{cm}^{-1})$ |
|-----------------------|-----------------------------------------|-----------------------------------------------|---------------------|
| -100                  | -2728.15516(2.011)                      | -2728.15341(1.011)                            | 384.08              |
| -80                   | -2728.14126(2.011)                      | -2728.13891(1.011)                            | 515.77              |
| -60                   | -2728.13000(2.012)                      | -2728.12683(1.011)                            | 695.04              |
| -40                   | -2728.12145(2.012)                      | -2728.11700(1.011)                            | 975.69              |
| -20                   | -2728.11578(2.013)                      | -2728.10928(1.011)                            | 1423.74             |
| 0                     | -2728.11332(2.013)                      | -2728.10385(1.013)                            | 2078.42             |
| 20                    | -2728.11430(2.013)                      | -2728.10804(1.013)                            | 1373.91             |
| 40                    | -2728.11840(2.013)                      | -2728.11413(1.013)                            | 937.16              |
| 60                    | -2728.12522(2.012)                      | -2728.12213(1.013)                            | 678.86              |
| 80                    | -2728.13459(2.012)                      | -2728.13224(1.013)                            | 516.28              |
| 100                   | -2728.14647(2.012)                      | -2728.14461(1.013)                            | 408.63              |

**Table S17.** The spin populations at N, C radicals and Li under different EFs of BS state of NVLi-C, based on Becke 's population analysis.

| field/ $10^{-4}$ a.u. | N        | C1       | C2      | C3       | Li       |
|-----------------------|----------|----------|---------|----------|----------|
| -100                  | -0.00001 | -0.00105 | 0.54176 | -0.54095 | 0.00014  |
| 0                     | -0.00019 | -0.55328 | 0.29250 | 0.26703  | -0.00116 |
| 100                   | 0.00101  | -0.57954 | 0.32322 | 0.32206  | -0.00917 |
